# Supplementary material for: Direct detection of condensed particulate polycyclic aromatic hydrocarbons on a molecular composition level at low pg m -3 mass concentrations via proton-transfer-reaction mass-spectrometry
Source: Copernicus journal article supplement (doi:10.5194/ar-2024-11), 2024-04-16
Supplement: Supplementary file 1 [file ar-2024-11-supplement.pdf]

## Supporting Information:

# Direct detection of condensed particulate polycyclic aromatic hydrocarbons on a molecular composition level at low $\mu\text{g m}^{-3}$ mass concentrations via proton-transfer-reaction mass-spectrometry

5 Tobias Reinecke<sup>1</sup>, Markus Leiminger<sup>1</sup>, Andreas Klinger<sup>1</sup>, Markus Müller<sup>1</sup>

<sup>1</sup>IONICON Analytik GmbH, Innsbruck, 6020, Austria

Correspondence to: Markus Müller (markus.mueller@ionicon.com)

### Supporting Figures

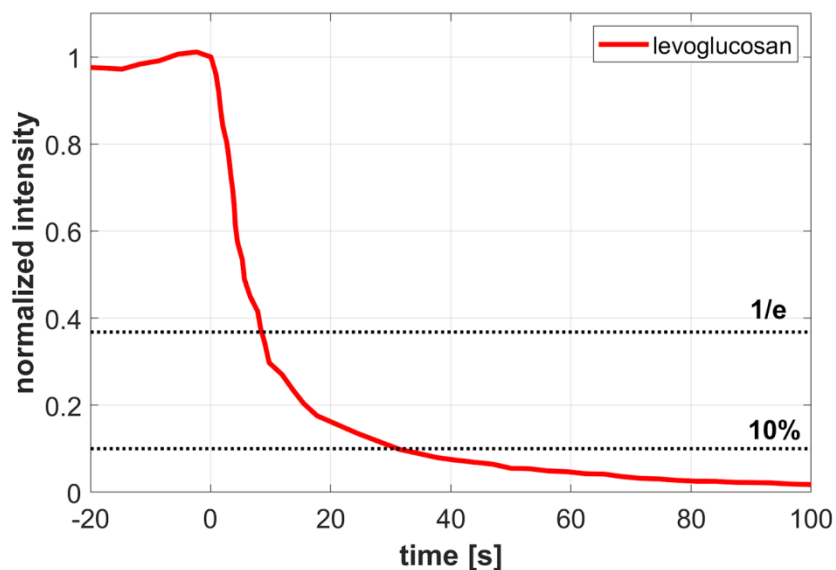

10 **Figure S1: Response of the CHARON FUSION PTR-TOF 10k for atomized polydisperse levoglucosan particles. Levoglucosan mass concentrations were in the range of  $0.5 \mu\text{g m}^{-3}$ . A constant concentration of levoglucosan particles was supplied for a few minutes prior to switching to CHARON HEPA mode to follow the signal decay. 1/e decay times equal to 8 s, a decay down to 10% equals to 34 s.**

15

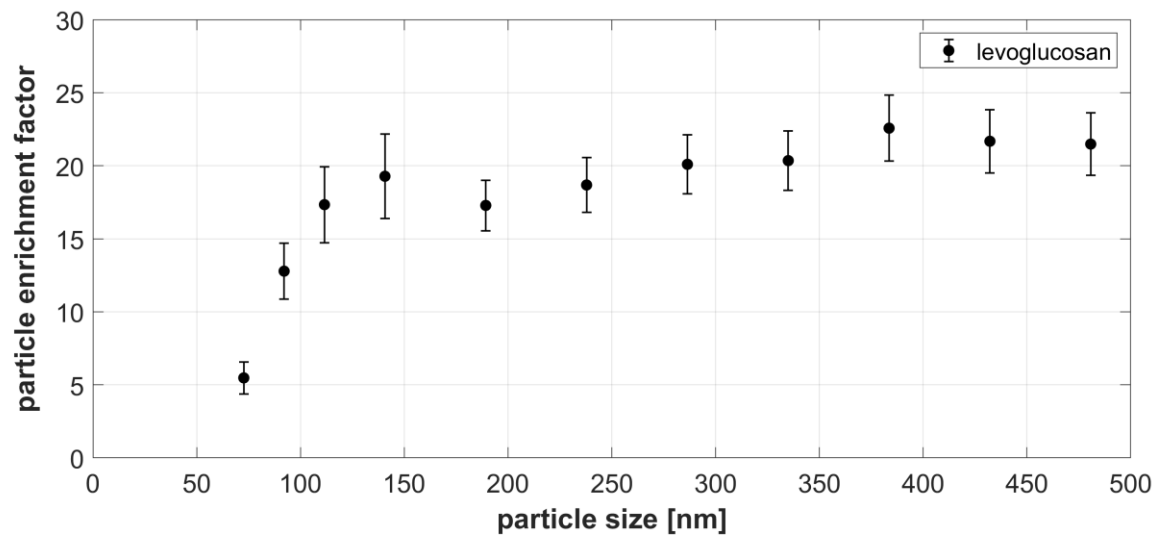

Figure S2: Particle size dependent enrichment factor of the CHARON particle inlet as measured for levoglucosan particles.

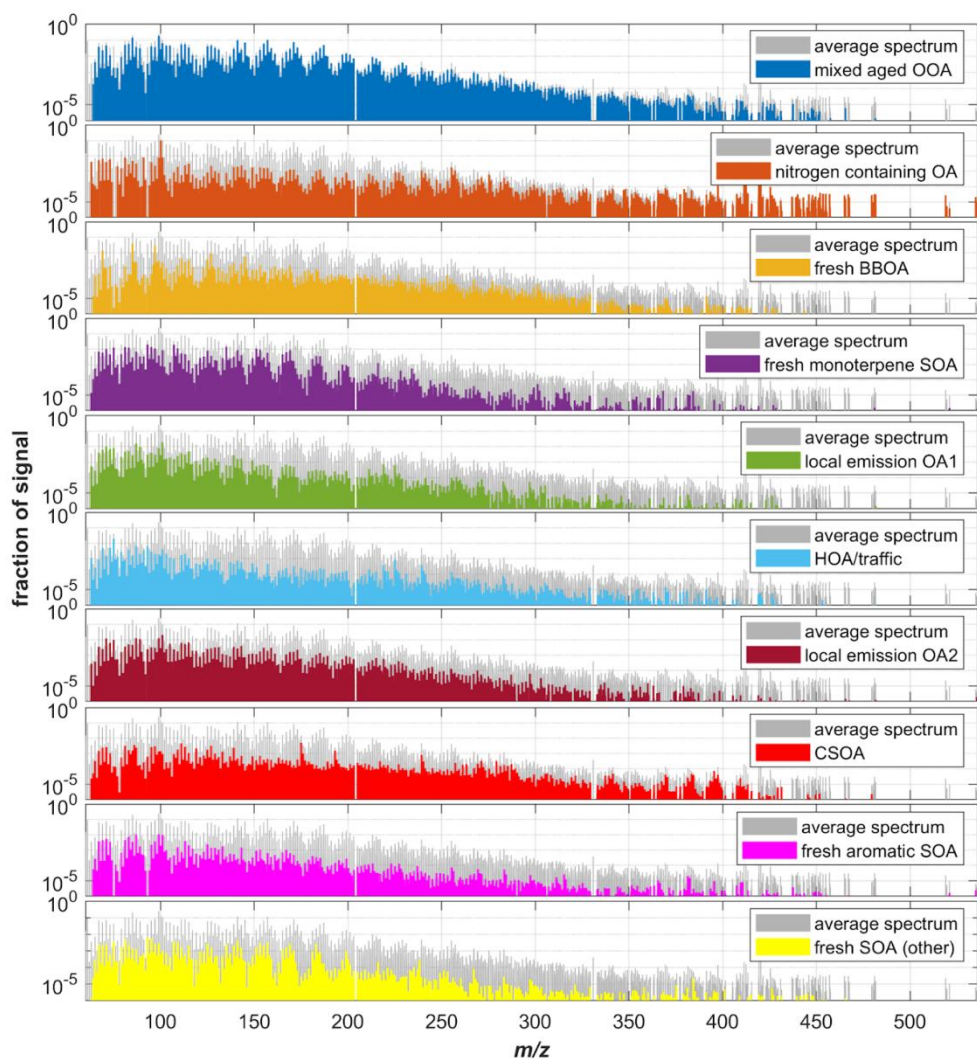

20 **Figures S3: Mass spectra of all identified factors (in respective colors). Grey bars illustrate the average mass spectrum as recorded during the entire measurement period.**

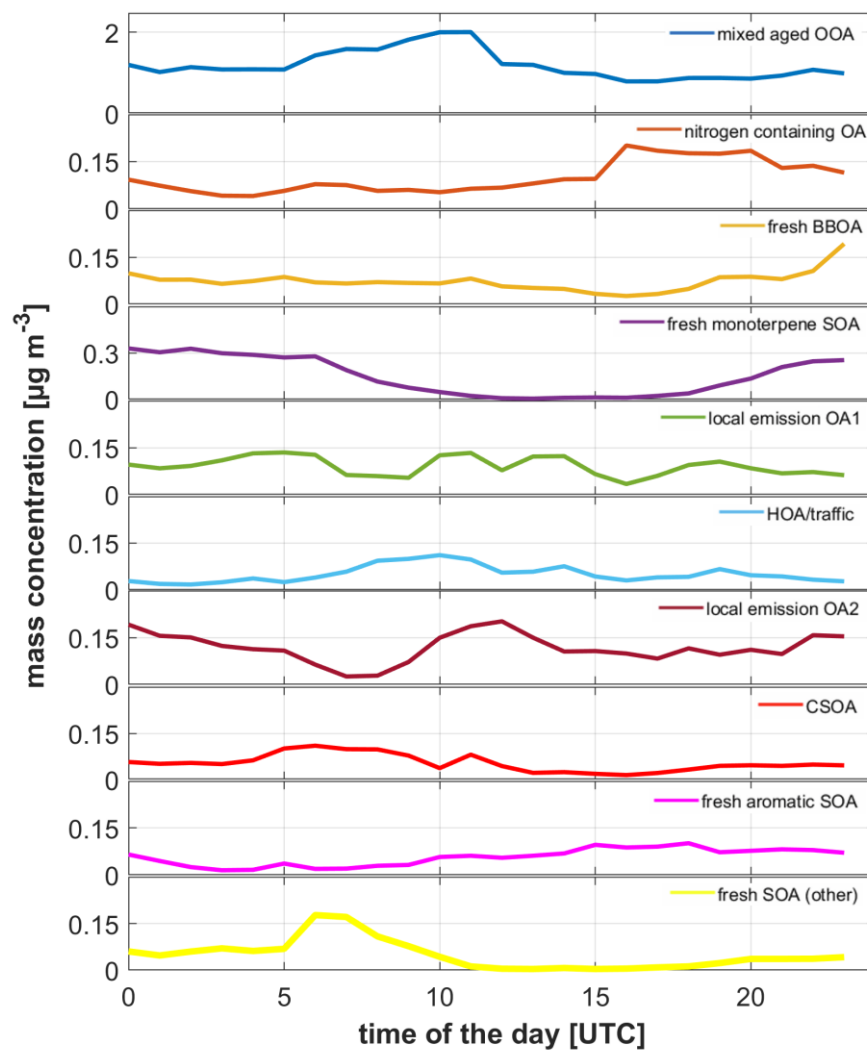

Figures S4: Diurnal variations of all identified factors.
